# Supplementary material for: Mechanisms of point defect formation and ionic conduction in divalent cation-doped lanthanum oxybromide: first-principles and experimental study
Source: Royal Society of Chemistry journal article supplement (doi:10.1039/d3dt01640d), 2023-01-01
Supplement: d3dt01640d1.pdf [file d3dt01640d1.pdf]

Supplemental material

Mechanisms of Point Defect Formation and Ionic Conduction in Divalent Cation-Doped Lanthanum  
Oxybromide: First-Principles and Experimental Study

Kazuki Shitara<sup>1,2</sup>, Akihito Kuwabara<sup>1</sup>, Naoyoshi Nunotani<sup>3</sup>, Muhammad Radzi Iqbal Bin Misran<sup>3</sup>,  
Miki Inada<sup>4</sup>, Tomoki Uchiyama<sup>5</sup>, Yoshiharu Uchimoto<sup>5</sup>, Nobuhito Imanaka<sup>3</sup>

<sup>1</sup>Nanostructures Research Laboratory, Japan Fine Ceramics Center, 2-4-1 Mutsuno, Nagoya, Aichi  
456-8587, Japan

<sup>2</sup>Joint and Welding Research Institute, Osaka University, 11-1 Mihogaoka, Ibaraki, Osaka 567-0047,  
Japan

<sup>3</sup>Department of Applied Chemistry, Faculty of Engineering, Osaka University, 2-1 Yamadaoka, Suita,  
Osaka 565-0871, Japan

<sup>4</sup>Center of Advanced Instrumental Analysis, Kyushu University, 6-1 Kasuga-Koen, Kasuga, Fukuoka  
816-8580, Japan

<sup>5</sup>Graduate School of Human and Environmental Studies, Kyoto University, Nihonmatsu-cho, Yoshida,  
Sakyo-ku, Kyoto, Kyoto 606-8317, Japan

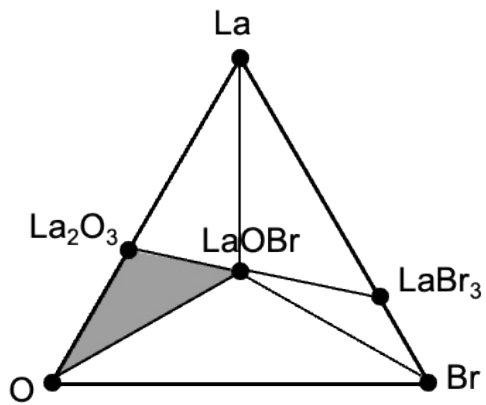

Figure S1 A schematic phase diagram of the La-O-Br ternary system. Grey area means the assumed equilibrium condition in this study.

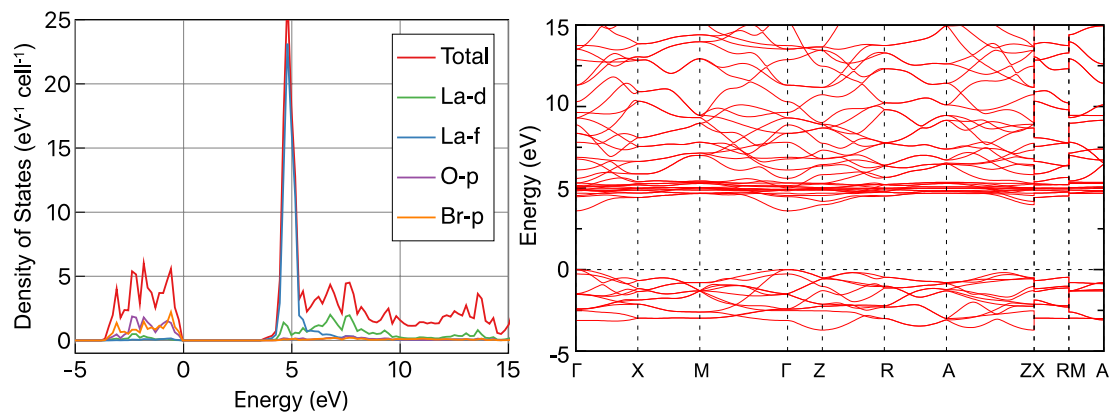

Figure S2 Calculated density of states (DOS) and band structure of pure LaOBr.

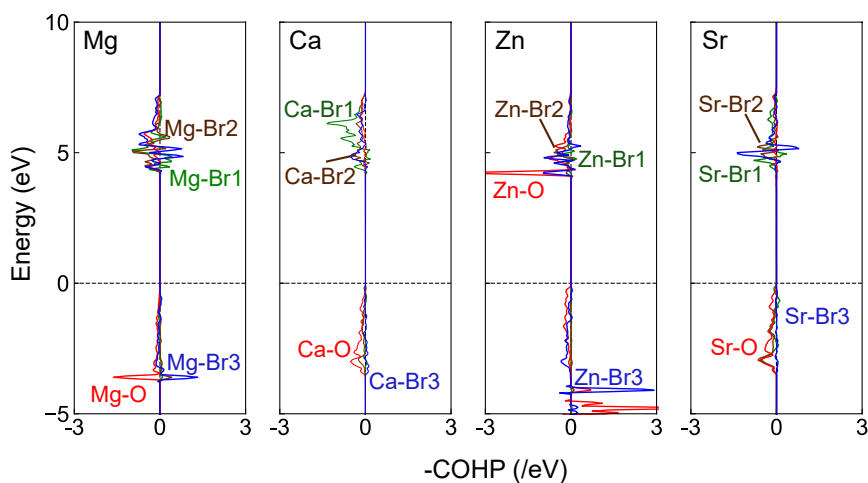

Figure S3 Calculated COHP of  $M^{2+}$ -doped LaOBr models. It is noted that negative COHP was plotted. Br1, Br2, and Br3 correspond to Br ions bonded to substitutional  $M$  ( $M$ : Mg, Ca, Zn, Sr) ions in Fig. 3(b-e).

We applied crystal orbital Hamilton population (COHP) analysis<sup>1</sup> to the  $M^{2+}$ -doped models to confirm these interactions. Figure 4 shows the calculated negative COHP ( $-COHP$ ) values. The Fermi level was set to 0 eV. Positive and negative  $-COHP$  values indicate bonding and antibonding orbitals, respectively. Bonding states between substitutional  $M$  and Br at the B r3 site were found to be approximately  $-4$  eV for the doped Mg and Zn, suggesting strong bonding interactions between these atoms. Less  $-COHP$  values were observed for Ca and Sr.

1 S. Maintz, V. L. Deringer, A. L. Tchougréeff and R. Dronskowski, *Journal of Computational Chemistry*, 2016, **37**, 1030–1035.

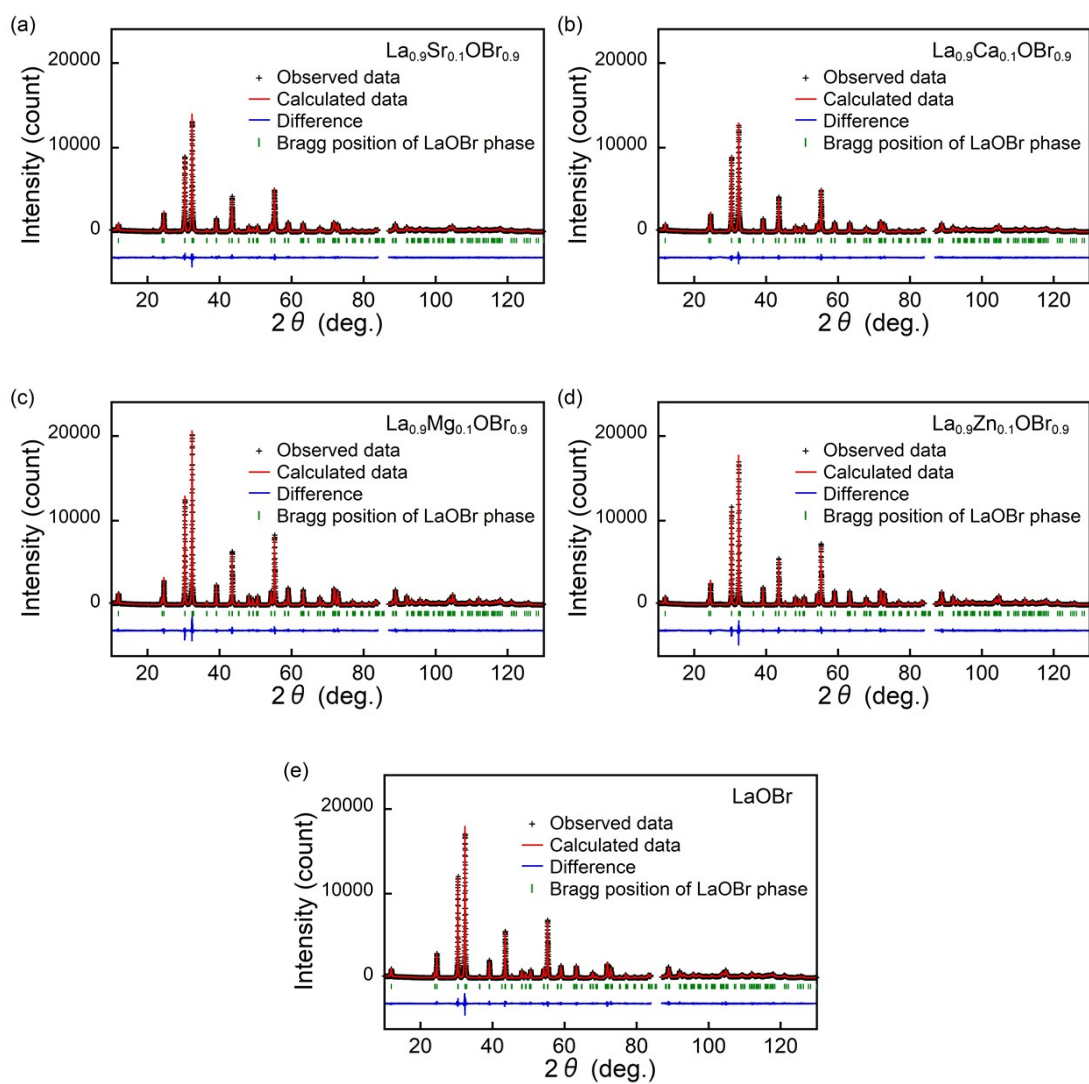

Figure S4 Results of the Rietveld refinements for  $\text{La}_{0.9}M_{0.1}\text{OBr}_{0.9}$  ( $M$ : Sr, Ca, Mg, Zn) and  $\text{LaOBr}$ .

Table S1 Structural parameters determined by Rietveld refinements for  $\text{La}_{0.9}\text{M}_{0.1}\text{OBr}_{0.9}$  ( $M$ : Sr, Ca, Mg, Zn) and LaOBr.

| Sample                                                                                                                                                         | Atom | Wyckoff position | $g$ | $x$ | $y$ | $z$              | $B$ ( $\text{\AA}^2$ ) |
|----------------------------------------------------------------------------------------------------------------------------------------------------------------|------|------------------|-----|-----|-----|------------------|------------------------|
| $\text{La}_{0.9}\text{Sr}_{0.1}\text{OBr}_{0.9}$                                                                                                               | La   | $2c$             | 0.9 | 0   | 1/2 | 0.1623(1)        | 0.50(1)                |
|                                                                                                                                                                | Sr   | $2c$             | 0.1 | 0   | 1/2 | = $z(\text{La})$ | = $B(\text{La})$       |
|                                                                                                                                                                | O    | $2a$             | 1   | 0   | 0   | 0                | 1.02(11)               |
|                                                                                                                                                                | Br   | $2c$             | 0.9 | 0   | 1/2 | 0.6365(1)        | 0.40(2)                |
| Space group: $P4/nmm$ , $a = 4.1581(1)$ $\text{\AA}$ , $c = 7.3823(1)$ $\text{\AA}$ , $V = 127.637(2)$ $\text{\AA}^3$ , $R_{\text{wp}} = 9.05\%$ , $S = 1.52$  |      |                  |     |     |     |                  |                        |
| $\text{La}_{0.9}\text{Ca}_{0.1}\text{OBr}_{0.9}$                                                                                                               | La   | $2c$             | 0.9 | 0   | 1/2 | 0.1619(1)        | 0.40(1)                |
|                                                                                                                                                                | Ca   | $2c$             | 0.1 | 0   | 1/2 | = $z(\text{La})$ | = $B(\text{La})$       |
|                                                                                                                                                                | O    | $2a$             | 1   | 0   | 0   | 0                | 1.28(10)               |
|                                                                                                                                                                | Br   | $2c$             | 0.9 | 0   | 1/2 | 0.6364(1)        | 0.66(2)                |
| Space group: $P4/nmm$ , $a = 4.1557(1)$ $\text{\AA}$ , $c = 7.3879(1)$ $\text{\AA}$ , $V = 127.589(2)$ $\text{\AA}^3$ , $R_{\text{wp}} = 8.83\%$ , $S = 1.45$  |      |                  |     |     |     |                  |                        |
| $\text{La}_{0.9}\text{Mg}_{0.1}\text{OBr}_{0.9}$                                                                                                               | La   | $2c$             | 0.9 | 0   | 1/2 | 0.1617(1)        | 0.42(1)                |
|                                                                                                                                                                | Mg   | $2c$             | 0.1 | 0   | 1/2 | = $z(\text{La})$ | = $B(\text{La})$       |
|                                                                                                                                                                | O    | $2a$             | 1   | 0   | 0   | 0                | 1.25(9)                |
|                                                                                                                                                                | Br   | $2c$             | 0.9 | 0   | 1/2 | 0.6363(1)        | 0.71(2)                |
| Space group: $P4/nmm$ , $a = 4.1553(1)$ $\text{\AA}$ , $c = 7.3855(1)$ $\text{\AA}$ , $V = 127.520(1)$ $\text{\AA}^3$ , $R_{\text{wp}} = 9.26\%$ , $S = 1.58$  |      |                  |     |     |     |                  |                        |
| $\text{La}_{0.9}\text{Zn}_{0.1}\text{OBr}_{0.9}$                                                                                                               | La   | $2c$             | 0.9 | 0   | 1/2 | 0.1615(1)        | 0.44(1)                |
|                                                                                                                                                                | Zn   | $2c$             | 0.1 | 0   | 1/2 | = $z(\text{La})$ | = $B(\text{La})$       |
|                                                                                                                                                                | O    | $2a$             | 1   | 0   | 0   | 0                | 1.23(11)               |
|                                                                                                                                                                | Br   | $2c$             | 0.9 | 0   | 1/2 | 0.6368(1)        | 0.51(2)                |
| Space group: $P4/nmm$ , $a = 4.1551(1)$ $\text{\AA}$ , $c = 7.3866(1)$ $\text{\AA}$ , $V = 127.529(1)$ $\text{\AA}^3$ , $R_{\text{wp}} = 10.10\%$ , $S = 1.64$ |      |                  |     |     |     |                  |                        |
| LaOBr                                                                                                                                                          | La   | $2c$             | 1   | 0   | 1/2 | 0.1618(1)        | 0.31(1)                |
|                                                                                                                                                                | O    | $2a$             | 1   | 0   | 0   | 0                | 0.42(9)                |
|                                                                                                                                                                | Br   | $2c$             | 1   | 0   | 1/2 | 0.6366(1)        | 0.73(2)                |
| Space group: $P4/nmm$ , $a = 4.1534(1)$ $\text{\AA}$ , $c = 7.3979(1)$ $\text{\AA}$ , $V = 127.619(2)$ $\text{\AA}^3$ , $R_{\text{wp}} = 9.48\%$ , $S = 1.59$  |      |                  |     |     |     |                  |                        |

Table S2 Average bond lengths of La/ $M$ -Br1, La/ $M$ -Br2, La/ $M$ -Br3, and La/ $M$ -O, where the Br1, Br2, Br3, and O sites are corresponding to those in Fig. 3(b-e). The ratio of La/ $M$ -Br3 to La/ $M$ -Br1 and that of La/ $M$ -O to La/ $M$ -Br2 were estimated from these average lengths.

| Sample                                           | La/ $M$ -Br1<br>( $\text{\AA}$ ) | La/ $M$ -Br2<br>( $\text{\AA}$ ) | La/ $M$ -Br3<br>( $\text{\AA}$ ) | La/ $M$ -O<br>( $\text{\AA}$ ) | La/ $M$ - Br3 | La/ $M$ - O   |
|--------------------------------------------------|----------------------------------|----------------------------------|----------------------------------|--------------------------------|---------------|---------------|
|                                                  |                                  |                                  |                                  |                                | La/ $M$ - Br1 | La/ $M$ - Br2 |
| $\text{La}_{0.9}\text{Sr}_{0.1}\text{OBr}_{0.9}$ | 3.5007(1)                        | 3.2944(4)                        | 3.8816(10)                       | 2.3994(3)                      | 1.1088(4)     | 0.7283(1)     |
| $\text{La}_{0.9}\text{Ca}_{0.1}\text{OBr}_{0.9}$ | 3.5057(9)                        | 3.2946(4)                        | 3.8822(9)                        | 2.3976(2)                      | 1.1074(4)     | 0.7277(1)     |
| $\text{La}_{0.9}\text{Mg}_{0.1}\text{OBr}_{0.9}$ | 3.5062(8)                        | 3.2951(4)                        | 3.8793(8)                        | 2.3962(2)                      | 1.1064(3)     | 0.7272(1)     |
| $\text{La}_{0.9}\text{Zn}_{0.1}\text{OBr}_{0.9}$ | 3.5112(9)                        | 3.2943(4)                        | 3.8754(9)                        | 2.3956(2)                      | 1.1037(4)     | 0.7272(1)     |
| LaOBr                                            | 3.5127(9)                        | 3.2939(4)                        | 3.8852(9)                        | 2.3969(2)                      | 1.1060(4)     | 0.7277(1)     |
